# Supplementary material
Source: publisher figshare collection journal article supplement (https://acs.figshare.com/ndownloader/files/4440550)
Supplement: Supplementary file 1 [file 4440550]

data_monofull 

_publ_requested_journal          Chem.Commun.
_publ_contact_author_name        'Yuriy V. Tolmachev'
_publ_contact_author_address     
;Kent State University
Chemistry Department
PO Box 5190
Kent, OH 44242
;
_publ_contact_author_email       ytolmach@kent.edu
_publ_contact_author_phone       '330-672-9815'
_publ_contact_author_fax         
;330-672-3816 
;
loop_
_publ_author_name
_publ_author_address
'Tolmachev, Yuriy V.'
;Kent State University
Chemistry Department
PO Box 5190
Kent, OH 44242
;
'Bunge, Scott D.'
;Kent State University
Chemistry Department
PO Box 5190
Kent, OH 44242
;
'Garanin, Evgeny M.'
;Kent State University
Chemistry Department
PO Box 5190
Kent, OH 44242
;
'Turanov, Aleksandr N.'
;Kent State University
Chemistry Department
PO Box 5190
Kent, OH 44242
; 
'Wirtz, Amy'
;Kent State University
Chemistry Department
PO Box 5190
Kent, OH 44242
; 
 
_audit_creation_method            SHELXL-97 
_chemical_name_systematic 
; 
 ? 
; 
_chemical_name_common             '(C6 O16 S6)2 (H2O)7 (H3O)4' 
_chemical_melting_point           ? 
_chemical_formula_moiety          ? 
_chemical_formula_sum 
 'C12 H26 O43 S12' 
_chemical_formula_weight          1243.05 
  
loop_ 
 _atom_type_symbol 
 _atom_type_description 
 _atom_type_scat_dispersion_real 
 _atom_type_scat_dispersion_imag 
 _atom_type_scat_source 
 'C'  'C'   0.0033   0.0016 
 'International Tables Vol C Tables 4.2.6.8 and 6.1.1.4' 
 'O'  'O'   0.0106   0.0060 
 'International Tables Vol C Tables 4.2.6.8 and 6.1.1.4' 
 'S'  'S'   0.1246   0.1234 
 'International Tables Vol C Tables 4.2.6.8 and 6.1.1.4' 
 'H'  'H'   0.0000   0.0000 
 'International Tables Vol C Tables 4.2.6.8 and 6.1.1.4' 
  
_symmetry_cell_setting            Orthorhombic 
_symmetry_space_group_name_H-M    Pnma 
  
loop_ 
 _symmetry_equiv_pos_as_xyz 
 'x, y, z' 
 '-x+1/2, -y, z+1/2' 
 'x+1/2, -y+1/2, -z+1/2' 
 '-x, y+1/2, -z' 
 '-x, -y, -z' 
 'x-1/2, y, -z-1/2' 
 '-x-1/2, y-1/2, z-1/2' 
 'x, -y-1/2, z' 
  
_cell_length_a                    9.637(3) 
_cell_length_b                    42.948(13) 
_cell_length_c                    9.514(3) 
_cell_angle_alpha                 90.00 
_cell_angle_beta                  90.00 
_cell_angle_gamma                 90.00 
_cell_volume                      3938(2) 
_cell_formula_units_Z             4 
_cell_measurement_temperature     189(2) 
_cell_measurement_reflns_used     1734 
_cell_measurement_theta_min       3.01 
_cell_measurement_theta_max       23.40 
  
_exptl_crystal_description        irregular 
_exptl_crystal_colour             colorless 
_exptl_crystal_size_max           0.20 
_exptl_crystal_size_mid           0.19 
_exptl_crystal_size_min           0.18 
_exptl_crystal_density_meas       'not measured' 
_exptl_crystal_density_diffrn     2.097 
_exptl_crystal_density_method     'not measured' 
_exptl_crystal_F_000              2536 
_exptl_absorpt_coefficient_mu     0.806 
_exptl_absorpt_correction_type    MULTI-SCAN 
_exptl_absorpt_correction_T_min   0.8554 
_exptl_absorpt_correction_T_max   0.8685 
_exptl_absorpt_process_details    SADABS 
  
_exptl_special_details 
; 
 ? 
; 
  
_diffrn_ambient_temperature       189(2) 
_diffrn_radiation_wavelength      0.71073 
_diffrn_radiation_type            MoK\a 
_diffrn_radiation_source          'fine-focus sealed tube' 
_diffrn_radiation_monochromator   graphite 
_diffrn_measurement_device_type   'Bruker APEX-II CCD' 
_diffrn_measurement_method        '\f and \w scans' 
_diffrn_detector_area_resol_mean  ? 
_diffrn_reflns_number             29208 
_diffrn_reflns_av_R_equivalents   0.1806 
_diffrn_reflns_av_sigmaI/netI     0.0852 
_diffrn_reflns_limit_h_min        -11 
_diffrn_reflns_limit_h_max        11 
_diffrn_reflns_limit_k_min        -50 
_diffrn_reflns_limit_k_max        51 
_diffrn_reflns_limit_l_min        -11 
_diffrn_reflns_limit_l_max        11 
_diffrn_reflns_theta_min          0.95 
_diffrn_reflns_theta_max          25.05 
_reflns_number_total              3544 
_reflns_number_gt                 2277 
_reflns_threshold_expression      >2sigma(I) 
  
_computing_data_collection        'Bruker APEX2' 
_computing_cell_refinement        'Bruker SAINT' 
_computing_data_reduction         'Bruker SAINT' 
_computing_structure_solution     'SHELXS-97 (Sheldrick, 2008)' 
_computing_structure_refinement   'SHELXL-97 (Sheldrick, 2008)' 
_computing_molecular_graphics     'Bruker SHELXTL' 
_computing_publication_material   'Bruker SHELXTL' 
  
_refine_special_details 
; 
 Refinement of F^2^ against ALL reflections.  The weighted R-factor wR and 
 goodness of fit S are based on F^2^, conventional R-factors R are based 
 on F, with F set to zero for negative F^2^. The threshold expression of 
 F^2^ > 2sigma(F^2^) is used only for calculating R-factors(gt) etc. and is 
 not relevant to the choice of reflections for refinement.  R-factors based 
 on F^2^ are statistically about twice as large as those based on F, and R- 
 factors based on ALL data will be even larger. 
; 
  
_refine_ls_structure_factor_coef  Fsqd 
_refine_ls_matrix_type            full 
_refine_ls_weighting_scheme       calc 
_refine_ls_weighting_details 
 'calc w=1/[\s^2^(Fo^2^)+(0.1000P)^2^+0.4498P] where P=(Fo^2^+2Fc^2^)/3' 
_atom_sites_solution_primary      direct 
_atom_sites_solution_secondary    difmap 
_atom_sites_solution_hydrogens    '.' 
_refine_ls_hydrogen_treatment     constr 
_refine_ls_extinction_method      none 
_refine_ls_extinction_coef        ? 
_refine_ls_number_reflns          3544 
_refine_ls_number_parameters      310 
_refine_ls_number_restraints      1 
_refine_ls_R_factor_all           0.1080 
_refine_ls_R_factor_gt            0.0602 
_refine_ls_wR_factor_ref          0.1915 
_refine_ls_wR_factor_gt           0.1581 
_refine_ls_goodness_of_fit_ref    1.119 
_refine_ls_restrained_S_all       1.121 
_refine_ls_shift/su_max           0.001 
_refine_ls_shift/su_mean          0.000 
  
loop_ 
 _atom_site_label 
 _atom_site_type_symbol 
 _atom_site_fract_x 
 _atom_site_fract_y 
 _atom_site_fract_z 
 _atom_site_U_iso_or_equiv 
 _atom_site_adp_type 
 _atom_site_occupancy 
 _atom_site_symmetry_multiplicity 
 _atom_site_calc_flag 
 _atom_site_refinement_flags 
 _atom_site_disorder_assembly 
 _atom_site_disorder_group 
O19 O 0.0998(5) 0.00165(11) 0.1508(5) 0.0240(12) Uani 1 1 d D . . 
S1 S 0.09851(19) 0.12618(4) -0.2044(2) 0.0212(4) Uani 1 1 d . . . 
S2 S 0.26419(19) 0.18817(4) -0.0598(2) 0.0195(4) Uani 1 1 d . . . 
S3 S 0.50909(19) 0.16778(4) 0.1805(2) 0.0214(4) Uani 1 1 d . . . 
S4 S 0.59012(19) 0.10640(4) 0.22807(19) 0.0216(4) Uani 1 1 d . . . 
S5 S 0.45162(18) 0.04486(4) 0.04771(18) 0.0166(4) Uani 1 1 d . . . 
S6 S 0.18816(18) 0.06550(4) -0.17072(19) 0.0175(4) Uani 1 1 d . . . 
O1 O 0.1390(6) 0.13088(13) -0.3460(5) 0.0329(14) Uani 1 1 d . . . 
O2 O -0.0135(5) 0.14222(13) -0.1421(6) 0.0329(14) Uani 1 1 d . . . 
O3 O 0.2105(5) 0.18669(12) -0.2017(5) 0.0257(12) Uani 1 1 d . . . 
O4 O 0.3937(5) 0.20488(12) -0.0472(5) 0.0271(12) Uani 1 1 d . . . 
O5 O 0.1619(5) 0.19612(11) 0.0449(5) 0.0264(12) Uani 1 1 d . . . 
O6 O 0.4162(5) 0.18692(12) 0.2571(5) 0.0265(12) Uani 1 1 d . . . 
O7 O 0.6256(5) 0.17959(13) 0.1085(6) 0.0326(14) Uani 1 1 d . . . 
O8 O 0.5614(5) 0.14129(12) 0.2918(5) 0.0261(12) Uani 1 1 d . . . 
O9 O 0.7245(5) 0.10659(12) 0.1671(6) 0.0300(13) Uani 1 1 d . . . 
O10 O 0.5528(6) 0.08638(13) 0.3384(5) 0.0303(13) Uani 1 1 d . . . 
O11 O 0.5944(5) 0.04769(11) 0.0948(5) 0.0213(11) Uani 1 1 d . . . 
O12 O 0.3589(5) 0.03287(12) 0.1554(5) 0.0234(12) Uani 1 1 d . . . 
O13 O 0.4352(5) 0.03118(12) -0.0905(5) 0.0260(12) Uani 1 1 d . . . 
O14 O 0.1360(5) 0.04028(11) -0.0928(5) 0.0253(12) Uani 1 1 d . . . 
O15 O 0.2525(5) 0.06197(12) -0.3031(5) 0.0259(12) Uani 1 1 d . . . 
O16 O 0.0577(5) 0.08924(11) -0.1877(5) 0.0225(12) Uani 1 1 d . . . 
O17 O 0.3578(5) 0.03478(12) 0.4521(5) 0.0259(12) Uani 1 1 d . . . 
O18 O 0.3769(6) 0.20665(13) 0.5788(6) 0.0391(15) Uani 1 1 d . . . 
O20 O 0.5338(10) 0.2500 0.6852(15) 0.081(4) Uani 1 2 d S . . 
O21 O 0.6187(15) 0.2500 0.9250(15) 0.103(5) Uani 1 2 d S . . 
O22 O 0.129(3) 0.2500 0.1935(15) 0.188(12) Uani 1 2 d S . . 
O23 O 0.348(2) 0.2500 0.3963(19) 0.157(7) Uani 1 2 d S . . 
O24 O 0.405(3) 0.2500 0.133(3) 0.199(10) Uani 1 2 d S . . 
C1 C 0.2460(7) 0.12323(15) -0.0892(7) 0.0138(14) Uani 1 1 d . . . 
C2 C 0.3116(7) 0.14823(16) -0.0228(7) 0.0149(15) Uani 1 1 d . . . 
C3 C 0.4157(7) 0.14034(16) 0.0737(7) 0.0174(15) Uani 1 1 d . . . 
C4 C 0.4568(7) 0.10975(16) 0.0958(7) 0.0141(14) Uani 1 1 d . . . 
C5 C 0.3963(7) 0.08486(15) 0.0240(7) 0.0130(14) Uani 1 1 d . . . 
C6 C 0.2888(7) 0.09262(15) -0.0674(7) 0.0133(14) Uani 1 1 d D . . 
  
loop_ 
 _atom_site_aniso_label 
 _atom_site_aniso_U_11 
 _atom_site_aniso_U_22 
 _atom_site_aniso_U_33 
 _atom_site_aniso_U_23 
 _atom_site_aniso_U_13 
 _atom_site_aniso_U_12 
O19 0.029(3) 0.022(3) 0.022(3) 0.001(2) -0.003(2) -0.002(2) 
S1 0.0195(9) 0.0203(10) 0.0237(10) -0.0013(8) -0.0083(8) 0.0015(8) 
S2 0.0213(9) 0.0141(9) 0.0232(10) 0.0011(7) 0.0007(8) -0.0001(7) 
S3 0.0204(9) 0.0206(10) 0.0232(10) -0.0050(8) -0.0039(8) -0.0018(8) 
S4 0.0191(9) 0.0254(10) 0.0203(10) -0.0019(8) -0.0068(8) 0.0018(8) 
S5 0.0179(9) 0.0158(9) 0.0162(9) 0.0008(7) -0.0002(7) 0.0023(7) 
S6 0.0177(9) 0.0158(9) 0.0189(9) -0.0017(7) -0.0027(7) -0.0012(7) 
O1 0.043(3) 0.036(3) 0.019(3) 0.002(2) -0.009(3) -0.003(3) 
O2 0.019(3) 0.031(3) 0.049(4) -0.003(3) -0.006(3) 0.005(2) 
O3 0.029(3) 0.024(3) 0.025(3) 0.005(2) -0.008(2) 0.002(2) 
O4 0.029(3) 0.020(3) 0.032(3) -0.001(2) -0.001(2) -0.005(2) 
O5 0.025(3) 0.021(3) 0.033(3) -0.002(2) 0.005(2) 0.005(2) 
O6 0.031(3) 0.025(3) 0.024(3) -0.008(2) -0.002(2) 0.000(2) 
O7 0.021(3) 0.038(3) 0.040(3) 0.001(3) -0.003(3) -0.011(2) 
O8 0.029(3) 0.025(3) 0.024(3) -0.004(2) -0.009(2) 0.003(2) 
O9 0.015(3) 0.035(3) 0.040(3) -0.001(3) -0.004(2) 0.001(2) 
O10 0.034(3) 0.036(3) 0.021(3) 0.003(2) -0.010(2) 0.000(3) 
O11 0.017(2) 0.025(3) 0.023(3) 0.002(2) 0.001(2) 0.004(2) 
O12 0.020(3) 0.026(3) 0.024(3) 0.004(2) 0.002(2) -0.002(2) 
O13 0.037(3) 0.023(3) 0.018(3) -0.005(2) -0.006(2) 0.009(2) 
O14 0.027(3) 0.022(3) 0.027(3) 0.003(2) -0.003(2) -0.006(2) 
O15 0.029(3) 0.032(3) 0.017(3) -0.007(2) 0.002(2) 0.002(2) 
O16 0.015(3) 0.018(3) 0.035(3) -0.004(2) -0.007(2) -0.001(2) 
O17 0.022(3) 0.033(3) 0.022(3) 0.001(2) 0.002(2) 0.002(2) 
O18 0.045(4) 0.023(3) 0.050(4) 0.004(3) 0.020(3) 0.006(3) 
O20 0.033(5) 0.029(5) 0.183(14) 0.000 0.018(7) 0.000 
O21 0.130(11) 0.037(6) 0.142(12) 0.000 0.098(10) 0.000 
O22 0.45(3) 0.025(6) 0.090(10) 0.000 0.151(16) 0.000 
O23 0.176(18) 0.168(18) 0.127(15) 0.000 0.027(14) 0.000 
O24 0.24(3) 0.141(18) 0.21(2) 0.000 -0.02(2) 0.000 
C1 0.013(3) 0.020(4) 0.009(3) -0.002(3) 0.002(3) -0.002(3) 
C2 0.010(3) 0.021(4) 0.014(3) 0.004(3) 0.004(3) -0.001(3) 
C3 0.013(3) 0.024(4) 0.016(4) -0.003(3) 0.008(3) -0.006(3) 
C4 0.009(3) 0.023(4) 0.010(3) -0.002(3) 0.001(3) 0.001(3) 
C5 0.012(3) 0.016(4) 0.012(3) -0.001(3) 0.001(3) 0.001(3) 
C6 0.017(3) 0.014(4) 0.009(3) 0.000(3) 0.003(3) -0.002(3) 
  
_geom_special_details 
; 
 All esds (except the esd in the dihedral angle between two l.s. planes) 
 are estimated using the full covariance matrix.  The cell esds are taken 
 into account individually in the estimation of esds in distances, angles 
 and torsion angles; correlations between esds in cell parameters are only 
 used when they are defined by crystal symmetry.  An approximate (isotropic) 
 treatment of cell esds is used for estimating esds involving l.s. planes. 
; 
  
loop_ 
 _geom_bond_atom_site_label_1 
 _geom_bond_atom_site_label_2 
 _geom_bond_distance 
 _geom_bond_site_symmetry_2 
 _geom_bond_publ_flag 
S1 O2 1.411(6) . ? 
S1 O1 1.417(6) . ? 
S1 O16 1.642(5) . ? 
S1 C1 1.799(7) . ? 
S2 O5 1.443(5) . ? 
S2 O4 1.445(5) . ? 
S2 O3 1.447(5) . ? 
S2 C2 1.810(7) . ? 
S3 O7 1.410(5) . ? 
S3 O6 1.417(5) . ? 
S3 O8 1.633(5) . ? 
S3 C3 1.798(7) . ? 
S4 O10 1.404(6) . ? 
S4 O9 1.419(5) . ? 
S4 O8 1.640(5) . ? 
S4 C4 1.804(7) . ? 
S5 O13 1.449(5) . ? 
S5 O11 1.453(5) . ? 
S5 O12 1.453(5) . ? 
S5 C5 1.813(7) . ? 
S6 O14 1.405(5) . ? 
S6 O15 1.412(5) . ? 
S6 O16 1.627(5) . ? 
S6 C6 1.806(7) . ? 
C1 C6 1.393(9) . ? 
C1 C2 1.397(9) . ? 
C2 C3 1.402(9) . ? 
C3 C4 1.388(10) . ? 
C4 C5 1.396(9) . ? 
C5 C6 1.393(9) . ? 
  
loop_ 
 _geom_angle_atom_site_label_1 
 _geom_angle_atom_site_label_2 
 _geom_angle_atom_site_label_3 
 _geom_angle 
 _geom_angle_site_symmetry_1 
 _geom_angle_site_symmetry_3 
 _geom_angle_publ_flag 
O2 S1 O1 122.7(4) . . ? 
O2 S1 O16 104.3(3) . . ? 
O1 S1 O16 107.2(3) . . ? 
O2 S1 C1 112.5(3) . . ? 
O1 S1 C1 111.8(3) . . ? 
O16 S1 C1 93.6(3) . . ? 
O5 S2 O4 114.5(3) . . ? 
O5 S2 O3 114.2(3) . . ? 
O4 S2 O3 114.1(3) . . ? 
O5 S2 C2 105.2(3) . . ? 
O4 S2 C2 103.7(3) . . ? 
O3 S2 C2 103.3(3) . . ? 
O7 S3 O6 123.0(3) . . ? 
O7 S3 O8 108.7(3) . . ? 
O6 S3 O8 105.4(3) . . ? 
O7 S3 C3 111.1(3) . . ? 
O6 S3 C3 110.8(3) . . ? 
O8 S3 C3 93.7(3) . . ? 
O10 S4 O9 122.9(3) . . ? 
O10 S4 O8 103.9(3) . . ? 
O9 S4 O8 107.5(3) . . ? 
O10 S4 C4 112.8(3) . . ? 
O9 S4 C4 111.3(3) . . ? 
O8 S4 C4 93.7(3) . . ? 
O13 S5 O11 114.7(3) . . ? 
O13 S5 O12 115.4(3) . . ? 
O11 S5 O12 113.3(3) . . ? 
O13 S5 C5 103.8(3) . . ? 
O11 S5 C5 103.7(3) . . ? 
O12 S5 C5 104.0(3) . . ? 
O14 S6 O15 123.0(3) . . ? 
O14 S6 O16 105.0(3) . . ? 
O15 S6 O16 108.5(3) . . ? 
O14 S6 C6 113.7(3) . . ? 
O15 S6 C6 108.6(3) . . ? 
O16 S6 C6 93.7(3) . . ? 
S3 O8 S4 116.7(3) . . ? 
S6 O16 S1 115.5(3) . . ? 
C6 C1 C2 121.6(6) . . ? 
C6 C1 S1 113.0(5) . . ? 
C2 C1 S1 125.4(5) . . ? 
C1 C2 C3 115.8(6) . . ? 
C1 C2 S2 121.7(5) . . ? 
C3 C2 S2 122.5(5) . . ? 
C4 C3 C2 122.1(6) . . ? 
C4 C3 S3 113.1(5) . . ? 
C2 C3 S3 124.8(5) . . ? 
C3 C4 C5 122.1(6) . . ? 
C3 C4 S4 112.6(5) . . ? 
C5 C4 S4 125.3(5) . . ? 
C6 C5 C4 115.6(6) . . ? 
C6 C5 S5 121.5(5) . . ? 
C4 C5 S5 122.8(5) . . ? 
C1 C6 C5 122.6(6) . . ? 
C1 C6 S6 111.6(5) . . ? 
C5 C6 S6 125.8(5) . . ? 
  
_diffrn_measured_fraction_theta_max    1.000 
_diffrn_reflns_theta_full              25.05 
_diffrn_measured_fraction_theta_full   1.000 
_refine_diff_density_max    1.441 
_refine_diff_density_min   -1.219 
_refine_diff_density_rms    0.143 


 
